# Supplementary material for: Molecular Profile of Advanced Thyroid Carcinomas by Next-Generation Sequencing: Characterizing Tumors Beyond Diagnosis for Targeted Therapy
Source: Oxford University Press journal article supplement (doi:10.1158/1535-7163.mct-17-0871), 2018-04-25
Supplement: 15357163mct170871-sup-188926_2_supp_4583742_p41s1h.docx [file 15357163mct170871-sup-188926_2_supp_4583742_p41s1h.docx]

Supplementary Table S3. Thyroid carcinomas with mutations involving PI3K/AKT pathway

| PI3K/AKT pathway mutation | Co-mutation(s) | Gender | Race/ Ethnic | Age (yrs) | | Diagnosis | | Site tested | | Sample Type | | Disease extent at testing | |
| --- | --- | --- | --- | --- | --- | --- | --- | --- | --- | --- | --- | --- | --- |
| *AKT1* E17K | *KRAS* Q61R | M | C | 59 | Papillary | | Thyroid | | Primary | | DM | |
| *AKT1* E17K | *BRAF* V600E | M | A | 48 | Papillary | | Thyroid | | Primary | | DM | |
| *ERBB2* V773M | *KRAS* G12V | F | H | 29 | Poorly differentiated | | Neck ST | | Recur | | DM | |
| *PIK3CA* H1047R | *BRAF* V600E | M | C | 25 | Papillary | | Thyroid | | Recur | | DM | |
| *PIK3CA* H1047R | *BRAF* V600E | M | H | 75 | Papillary | | LN | | Regional | | DM | |
| *PIK3CA* M1043I | *BRAF* V600E | M | H | 34 | Papillary | | Tracheal | | Recur | | DM | |
| *PIK3CA* M1043I | *BRAF* V600E *TP53* Q192* | F | C | 46 | Papillary | | Bone | | DM | | DM | |
| *PIK3CA* N1044K |  | M | C | 72 | Papillary | | Neck ST | | Recur | | Recur | |
| *PIK3CA* Q546K |  | M | C | 29 | Poorly differentiated | | Thyroid | | Primary | | DM | |

A, African American; C, Caucasian; F, female; H, Hispanic; LN, lymph node; M, Male; Recur, recurrence; ST, soft tissue; yrs, years
