# Supplementary material for: Molecular Profile of Advanced Thyroid Carcinomas by Next-Generation Sequencing: Characterizing Tumors Beyond Diagnosis for Targeted Therapy
Source: Oxford University Press journal article supplement (doi:10.1158/1535-7163.mct-17-0871), 2018-04-25
Supplement: 15357163mct170871-sup-188926_2_supp_4583745_p4nsnh.docx [file 15357163mct170871-sup-188926_2_supp_4583745_p4nsnh.docx]

Supplemental Table 5. Clinical characteristics of 39 poorly differentiated thyroid carcinoma patients

| Characteristic | All PDTC | Receiving Targeted therapy | | | No targeted therapy | | | P Value |
| --- | --- | --- | --- | --- | --- | --- | --- | --- |
|  | N = 39 | TSP Mut  N = 10 | No TSP Mut  N = 8 | P Value | TSP Mut  N = 12 | No TSP Mut  N = 9 | P Value |  |
| Gender | | | | | | |  | 0.72 |
| Female | 20 | 4 | 5 |  | 7 | 4 |  |  |
| Male | 19 | 6 | 3 |  | 5 | 5 |  |  |
| Age (at primary diagnosis) | | | | | | |  | 0.34 |
| Median, yr | 58.4 | 51.7 | 59.7 |  | 62.4 | 58.4 |  |  |
| Range, yr | (29.1-81.7) | (29.1-76.9) | (39.1-79.0) |  | (44.2-81.7) | (46.7-78.6) |  |  |
| Race | | | | | | |  | 0.61 |
| African A. | 3 | 0 | 1 |  | 2 | 0 |  |  |
| White | 33 | 9 | 6 |  | 10 | 8 |  |  |
| Other | 3 | 1 | 1 |  | 0 | 1 |  |  |
| Last follow up status | | | | | | |  | 0.14 |
| Alive | 22 | 8 | 2 | 0.05 | 7 | 5 | 1 |  |
| Deceased | 17 | 2 | 6 |  | 5 | 4 |  |  |

Statistical analysis using Chi square for gender, race and last follow up status, and using one-way Anova analysis for age distribution.
